# Supplementary material for: Modulation of Immunity, Antioxidant Status, Performance, Blood Hematology, and Intestinal Histomorphometry in Response to Dietary Inclusion of Origanum majorana in Domestic Pigeons’ Diet
Source: MDPI journal article supplement (doi:10.3390/life13030664), 2023-02-28

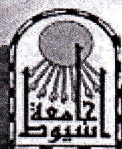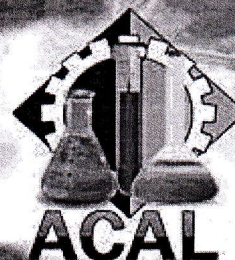

## Test Report

Report Number: 91016

Project Number: 8001916

Date of Issue: 9/20/2022

Customer: Hala Yehia abd El- Wahab

Address:

Report Number

(91016)

Project Number

(8001916)

Sample ID: 9006573

Date Sample(s) Received: 8/31/2022

Customer's Reference ID:

Matrix: Plant

| Analyte / Parameter                                  | Test Method    | Description                                 |
|------------------------------------------------------|----------------|---------------------------------------------|
| (-)-Adrenaline                                       | ACAL-APR-37-00 | Value:0.383%<br>Retention time:36.842 min   |
| (+)-P-menth-1-en-4-ol                                | ACAL-APR-37-00 | Value:11.773%<br>Retention time:11.907 min. |
| (([(2-Aminopropanoyl)amino]acetyl)amino) acetic acid | ACAL-APR-37-00 | Value:0.097%<br>Retention time:22.696 min   |
| (+)-Linalool                                         | ACAL-APR-37-00 | Value:0.640%<br>Retention time:10.841 min.  |
| (+)-Nor pseudoephedrine                              | ACAL-APR-37-00 | Value:0.114%<br>Retention time:12.566 min.  |
| .Alpha.-Fellandrene                                  | ACAL-APR-37-00 | Value:2.069%<br>Retention time:9.308 min.   |
| Alpha.-Thujene                                       | ACAL-APR-37-00 | Value:0.911%<br>Retention time:7.938 min.   |
| .Gamma.-Terpinen                                     | ACAL-APR-37-00 | Value:5.528%<br>Retention time:10.223 min.  |
| 1-(3-Ethoxyphenyl)-2-propanamine                     | ACAL-APR-37-00 | Value:0.076%<br>Retention time:22.031 min.  |
| 1,2-Dihydro-3-methoxy-2-oxo-9(10H)-Acridinone        | ACAL-APR-37-00 | Value:0.201%<br>Retention time:24.468 min.  |
| 1,2-Dimethylpropanamine                              | ACAL-APR-37-00 | Value:0.070%<br>Retention time:23.116 min.  |
| 10-Heptyl-10-octylicosane                            | ACAL-APR-37-00 | Value:0.979%<br>Retention time:36.521 min.  |
| 1-Methyloctadecylamine                               | ACAL-APR-37-00 | Value:0.060%<br>Retention time:19.618 min.  |
| 1R-.alpha.-Pinene                                    | ACAL-APR-37-00 | Value:0.173%<br>Retention time:8.078 min.   |
| 2-(2-Aminopropyl)phenol                              | ACAL-APR-37-00 | Value:0.087%<br>Retention time:19.537 min.  |
| 2-Fluoro-5-[1-hydroxy-2-(methylamino)ethyl] phenol   | ACAL-APR-37-00 | Value:0.202%<br>Retention time:32.779 min.  |



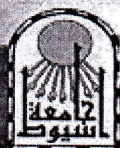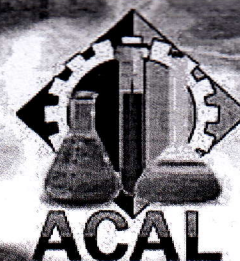

## Test Report

Report Number

(91016)

Report Number: 91016

Project Number: 8001916

Date of Issue: 9/20/2022

Customer: Hala Yehia abd El- Wahab

Address:

Project Number

(8001916)

Sample ID: 9006573

Date Sample(s) Received: 8/31/2022

Customer's Reference ID:

Matrix: Plant

| Analyte / Parameter                  | Test Method    | Description                                 |
|--------------------------------------|----------------|---------------------------------------------|
| 2-Isopropyl-5-methyl-phenol          | ACAL-APR-37-00 | Value:0.142%<br>Retention time:13.044 min.  |
| 2-Methyl-6-(4-methylphenyl) pyridine | ACAL-APR-37-00 | Value:0.647%<br>Retention time:27.848 min.  |
| 2-Methylpiperazine                   | ACAL-APR-37-00 | Value:0.0760%<br>Retention time:15.521 min. |
| 3-(1-Pyrrolyl)Phenol                 | ACAL-APR-37-00 | Value:1.660%<br>Retention time:29.982 min.  |
| 3-Carene                             | ACAL-APR-37-00 | Value:1.100%<br>Retention time:12.636 min.  |
| 3-Chloro-4-methyl-2-pentanol         | ACAL-APR-37-00 | Value:0.544%<br>Retention time:8.369 min.   |
| 3-Hexanol                            | ACAL-APR-37-00 | Value:0.566%<br>Retention time:8.200 min.   |
| 3-Hydroxy-N-methylphenethylamine     | ACAL-APR-37-00 | Value:0.102%<br>Retention time:15.667 min.  |
| 3-Methylaminopropylamine             | ACAL-APR-37-00 | Value:0.090%<br>Retention time:8.608 min.   |
| 4 (10)-Thujene                       | ACAL-APR-37-00 | Value:3.937%<br>Retention time:9.745 min.   |
| 5-(2-Aminopropyl)-2-methylphenol     | ACAL-APR-37-00 | Value:0.060%<br>Retention time:12.898 min.  |
| 9,10-dehydro-Isolongifolene          | ACAL-APR-37-00 | Value:0.750%<br>Retention time:18.051 min.  |
| 9-Octylicosane                       | ACAL-APR-37-00 | Value:3.071%<br>Retention time:44.291 min.  |
| Alpha. Terpinene                     | ACAL-APR-37-00 | Value:6.777%<br>Retention time:9.517 min.   |
| Alpha. Terpineol                     | ACAL-APR-37-00 | Value:3.566%<br>Retention time:12.030 min.  |
| Alpha.- Terpinolen                   | ACAL-APR-37-00 | Value:1.529%<br>Retention time:10.718 min.  |



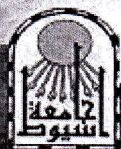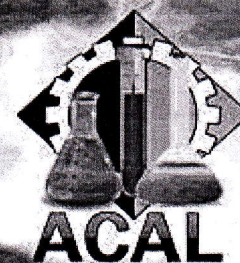

## Test Report

Report Number: 91016

Project Number: 8001916

Date of Issue: 9/20/2022

Customer: Hala Yehia abd El- Wahab

Address:

Report Number

(91016)

Project Number

(8001916)

Sample ID: 9006573

Date Sample(s) Received: 8/31/2022

Customer's Reference ID:

Matrix: Plant

| Analyte / Parameter                       | Test Method    | Description                                 |
|-------------------------------------------|----------------|---------------------------------------------|
| Alpha.,p-Dimethyl styrene                 | ACAL-APR-37-00 | Value:0.103%<br>Retention time:11.954 min.  |
| Beta Myrcene                              | ACAL-APR-37-00 | Value:0.531%<br>Retention time:9.028 min.   |
| Boric acid, ethyl-, didecyl ester         | ACAL-APR-37-00 | Value:2.479%<br>Retention time:40.124 min.  |
| Caryophyllene                             | ACAL-APR-37-00 | Value:1.492%<br>Retention time:15.037 min.  |
| Caryophyllene oxide                       | ACAL-APR-37-00 | Value:0.519%<br>Retention time:18.173 min.  |
| Cathine                                   | ACAL-APR-37-00 | Value:0.023%<br>Retention time:11.546 min.  |
| Cymol                                     | ACAL-APR-37-00 | Value:4.157%<br>Retention time:9.651 min.   |
| Dextroamphetamine                         | ACAL-APR-37-00 | Value:0.045%<br>Retention time:15.393 min.  |
| dl-Alanyl-dl-.alpha.-amino-n-butyric acid | ACAL-APR-37-00 | Value:0.055%<br>Retention time:21.676 min.  |
| dl-Alanyl-dl-leucine                      | ACAL-APR-37-00 | Value:0.063%<br>Retention time:18.814 min.  |
| DI-Alanyl-dl-methionine                   | ACAL-APR-37-00 | Value:0.034%<br>Retention time:19.758 min.  |
| DI-Alanyl-dl-norleucine                   | ACAL-APR-37-00 | Value:0.991%<br>Retention time:42.915 min.  |
| Docosane                                  | ACAL-APR-37-00 | Value:17.631%<br>Retention time:42.356 min. |
| Heneicosane                               | ACAL-APR-37-00 | Value:0.113%<br>Retention time:19.968 min.  |
| Hexahydrofarnesyl acetone                 | ACAL-APR-37-00 | Value:0.489%<br>Retention time:21.763 min.  |
| L-Alanyl-l-alanyl-l-alanine methyl ester  | ACAL-APR-37-00 | Value:0.141%<br>Retention time:13.312 min.  |



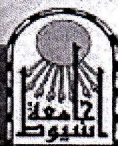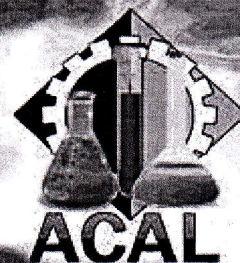

## Test Report

Report Number: 91016

Project Number: 8001916

Date of Issue: 9/20/2022

Customer: Hala Yehia abd El -Wahab

Address:

Report Number

(91016)

Project Number

(8001916)

Sample ID: 9006573

Date Sample(s) Received: 8/31/2022

Customer's Reference ID:

Matrix: Plant

| Analyte / Parameter                                   | Test Method    | Description                                 |
|-------------------------------------------------------|----------------|---------------------------------------------|
| n-Eicosane                                            | ACAL-APR-37-00 | Value:0.387%<br>Retention time:33.630 min.  |
| N-Methoxy-1-ribofuranosyl-4-imidazolecarboxylic amide | ACAL-APR-37-00 | Value:0.130%<br>Retention time:23.046 min.  |
| N-Methyl-N-(4-pentenyl)amine                          | ACAL-APR-37-00 | Value:0.0370%<br>Retention time:13.417 min. |
| n-Octacosane                                          | ACAL-APR-37-00 | Value:1.832%<br>Retention time:39.640 min.  |
| n-Pentadecane                                         | ACAL-APR-37-00 | Value:0.119%<br>Retention time:16.249 min.  |
| Phytane                                               | ACAL-APR-37-00 | Value:0.921%<br>Retention time:34.307 min.  |
| Squalene                                              | ACAL-APR-37-00 | Value:0.376%<br>Retention time:34.913 min.  |

Approved:

Dr. Nagwa Abo El-Maali

ACAL Lab Manager

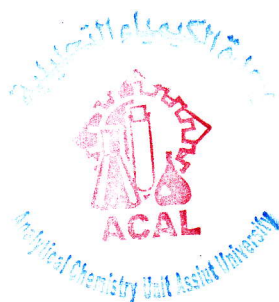



## Assiut University



**Sample ID: 9006573**

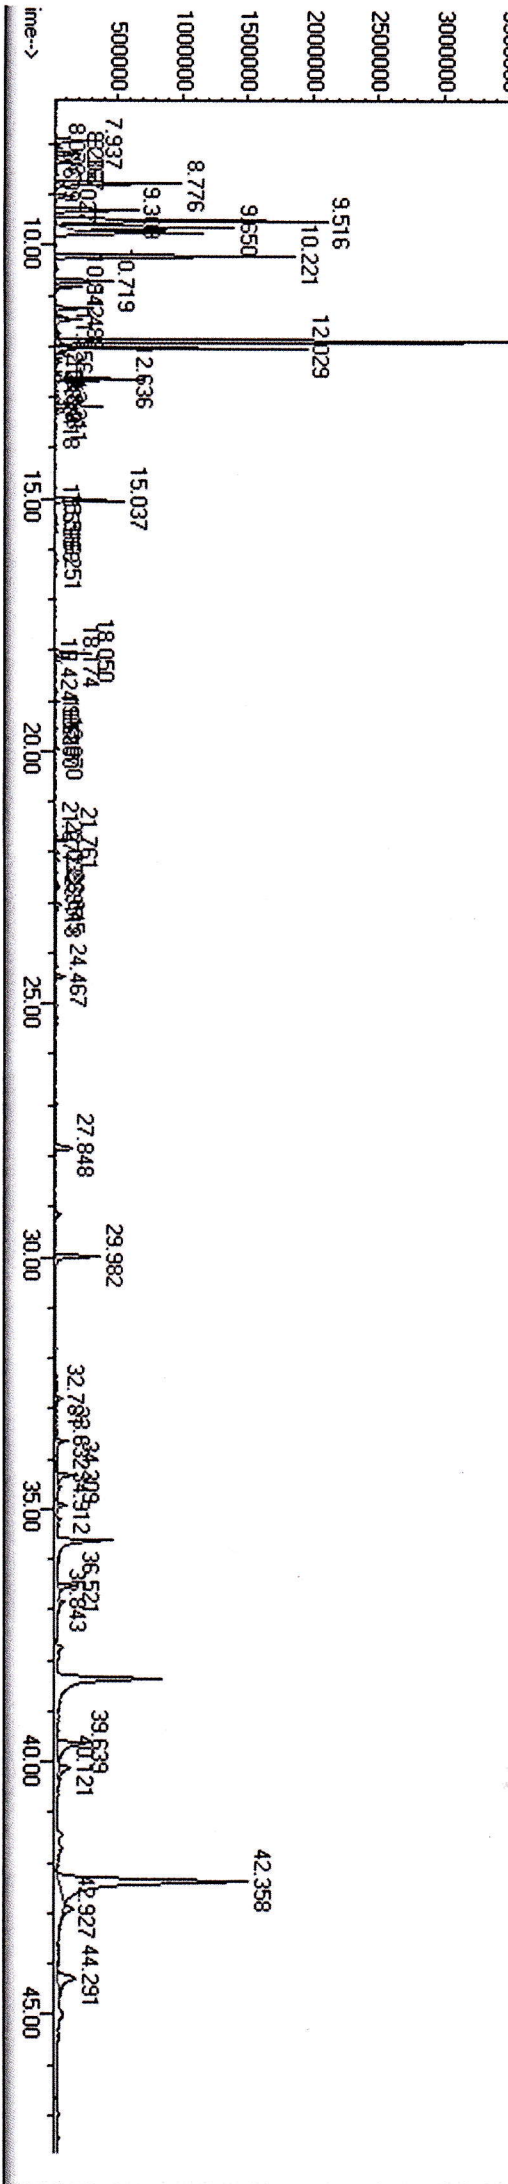

Supplement: s1 [file s1]
